# Supplementary material for: Genomic characterization of Listeria monocytogenes isolates reveals that their persistence in a pig slaughterhouse is linked to the presence of benzalkonium chloride resistance genes
Source: PubMed Central journal article supplement (PMC6302515; doi:10.1186/s12866-018-1363-9), 2018-12-20
Supplement: 12866_2018_1363_MOESM1_ESM.pdf [file 12866_2018_1363_MOESM1_ESM.pdf]

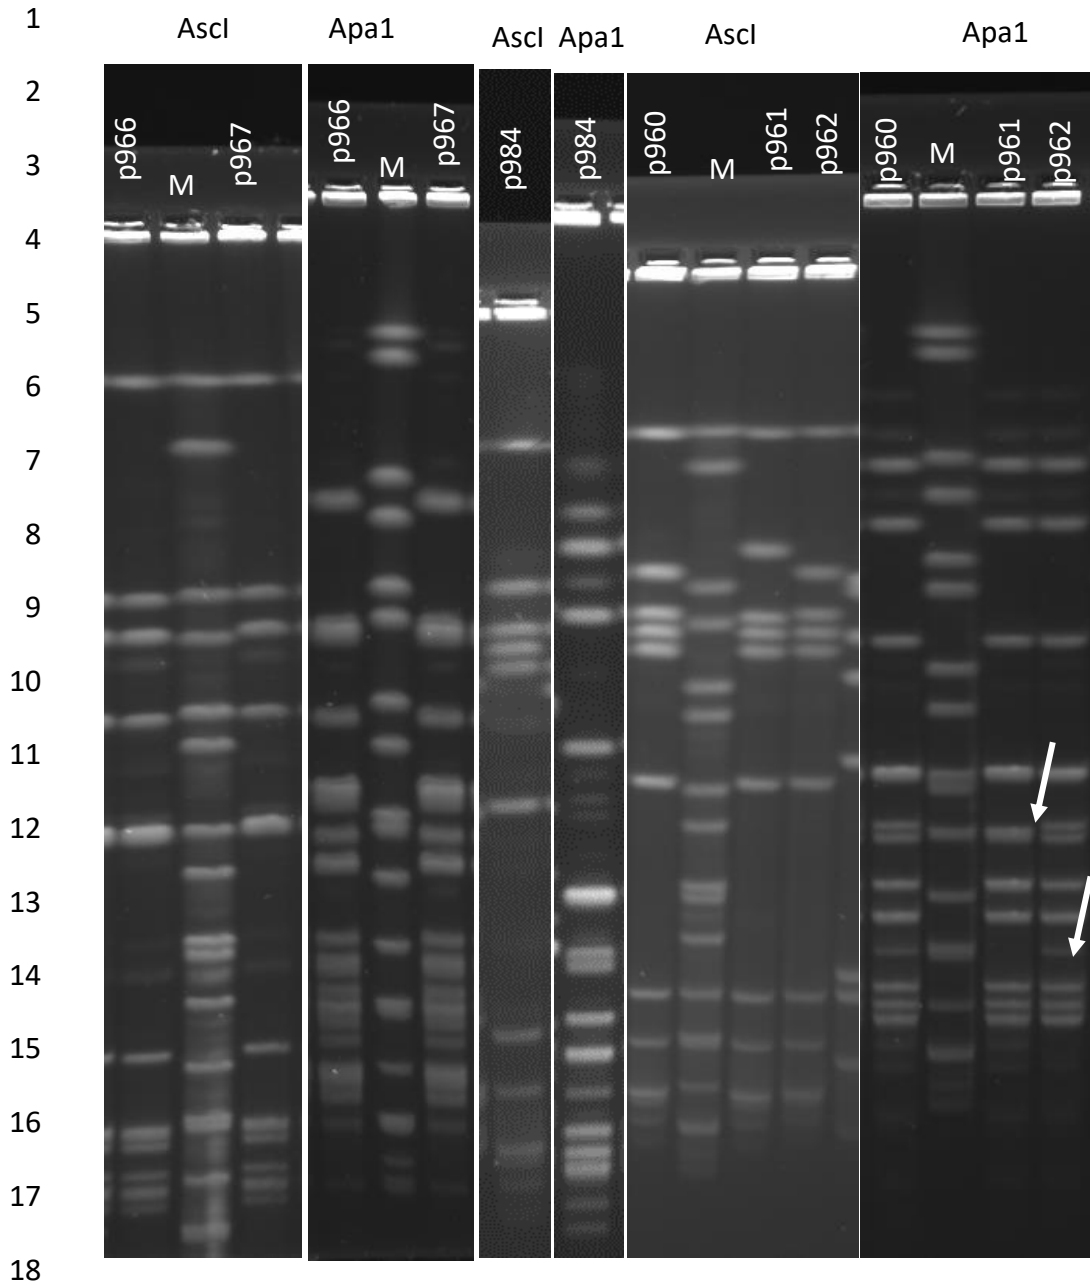

19 -Supplementary Figure S1

20 Pulsed field gel electrophoresis profile of Ascl and Apa1 restriction enzymes in *L.*

21 *monocytogenes* strains isolated from a slaughterhouse over a four weeks period.
